# Supplementary material
Source: HighWire-hosted journal article supplement (https://www.cancerbiomed.org/content/20/10/765)
Supplement: media-1 [file media-1.pdf]

## Supplementary materials

**Table S1** Baseline characteristics of the 142 matched patients

|                                        | Overall <i>n</i> = 142 | First-line chemotherapy regimen |                      | <i>P</i> value |
|----------------------------------------|------------------------|---------------------------------|----------------------|----------------|
|                                        |                        | GS ( <i>n</i> = 71)             | GnP ( <i>n</i> = 71) |                |
| Gender                                 |                        |                                 |                      | 0.606          |
| Male                                   | 86 (60.6%)             | 41 (57.7%)                      | 45 (63.4%)           |                |
| Female                                 | 56 (39.4%)             | 30 (42.3%)                      | 26 (36.6%)           |                |
| Age, years                             |                        |                                 |                      | 0.858          |
| ≤ 65                                   | 96 (67.6%)             | 49 (69.0%)                      | 47 (66.2%)           |                |
| > 65                                   | 46 (32.4%)             | 22 (31.0%)                      | 24 (33.8%)           |                |
| ECOG                                   |                        |                                 |                      | 0.609          |
| 0                                      | 84 (59.2%)             | 44 (62.0%)                      | 40 (56.3%)           |                |
| 1                                      | 58 (40.8%)             | 27 (38.0%)                      | 31 (43.7%)           |                |
| BMI, median (range), kg/m <sup>2</sup> | 21.8 (15.0, 35.3)      | 21.9 (15.0, 27.6)               | 21.6 (16.2, 35.3)    | 0.950          |
| Smoking history                        |                        |                                 |                      | 0.229          |
| Yes                                    | 56 (39.4%)             | 24 (33.8%)                      | 32 (45.1%)           |                |
| No                                     | 86 (60.6%)             | 47 (66.2%)                      | 39 (54.9%)           |                |
| Drinking history                       |                        |                                 |                      | 0.315          |
| Yes                                    | 32 (22.5%)             | 13 (18.3%)                      | 19 (26.8%)           |                |
| No                                     | 110 (77.5%)            | 58 (81.7%)                      | 52 (73.2%)           |                |
| Diabetes history                       |                        |                                 |                      | 0.465          |
| Yes                                    | 43 (30.3%)             | 19 (26.8%)                      | 24 (33.8%)           |                |
| No                                     | 99 (69.7%)             | 52 (73.2%)                      | 47 (66.2%)           |                |
| Surgery before chemotherapy            |                        |                                 |                      | 0.244          |
| Yes                                    | 13 (9.2%)              | 9 (12.7%)                       | 4 (5.6%)             |                |
| No                                     | 129 (90.8%)            | 62 (87.3%)                      | 67 (94.4%)           |                |
| Elevated CA19-9                        |                        |                                 |                      | 1.000          |
| Yes                                    | 113 (79.6%)            | 57 (80.3%)                      | 56 (78.9%)           |                |
| No                                     | 29 (20.4%)             | 14 (19.7%)                      | 15 (21.1%)           |                |
| Baseline stage                         |                        |                                 |                      | 1.000          |
| Locally advanced                       | 52 (36.6%)             | 26 (36.6%)                      | 26 (36.6%)           |                |
| Metastatic                             | 90 (63.4%)             | 45 (63.4%)                      | 45 (63.4%)           |                |
| Liver metastases                       |                        |                                 |                      | 0.737          |
| Yes                                    | 69 (48.6%)             | 33 (46.5%)                      | 36 (50.7%)           |                |
| No                                     | 73 (51.4%)             | 38 (53.5%)                      | 35 (49.3%)           |                |
| Multiple metastases                    |                        |                                 |                      | 0.502          |
| Yes                                    | 24 (16.9%)             | 10 (14.1%)                      | 14 (19.7%)           |                |
| No                                     | 118 (83.1%)            | 61 (85.9%)                      | 57 (80.3%)           |                |

**Table S2** Response to chemotherapy among the 142 matched patients

|                  | Overall <i>n</i> = 142 | First-line chemotherapy regimen |                      | <i>P</i> value |
|------------------|------------------------|---------------------------------|----------------------|----------------|
|                  |                        | GS ( <i>n</i> = 71)             | GnP ( <i>n</i> = 71) |                |
| Best response    |                        |                                 |                      | 0.202          |
| CR               | 0                      | 0                               | 0                    |                |
| PR               | 17 (12.0%)             | 11 (15.5%)                      | 6 (8.5%)             |                |
| SD               | 96 (67.6%)             | 49 (69.0%)                      | 47 (66.2%)           |                |
| PD               | 29 (20.4%)             | 11 (15.5%)                      | 18 (25.4%)           |                |
| ORR              | 17 (12.0%)             | 11 (15.5%)                      | 6 (8.5%)             | 0.301          |
| DCR              | 113 (79.6%)            | 60 (84.5%)                      | 53 (74.6%)           | 0.212          |
| Change in CA19-9 |                        |                                 |                      | 0.870          |
| Not expressed    | 28 (19.7%)             | 14 (19.7%)                      | 14 (19.7%)           |                |
| Declined > 30%   | 82 (57.7%)             | 42 (59.2%)                      | 40 (56.3%)           |                |
| Declined ≤ 30%   | 26 (18.3%)             | 13 (18.3%)                      | 13 (18.3%)           |                |
| Unknown          | 6 (4.2%)               | 2 (2.8%)                        | 4 (5.6%)             |                |

CR, complete response; DCR, disease control rate; ORR, objective response rate; PD, progressive disease; PR, partial response; SD, stable disease.

**Table S3** Univariate and multivariate analyses of overall survival among the 142 matched patients

| Variables                                        | Univariate analysis |                   | Multivariate analysis |                   |
|--------------------------------------------------|---------------------|-------------------|-----------------------|-------------------|
|                                                  | HR (95% CI)         | <i>P</i> value    | HR (95% CI)           | <i>P</i> value    |
| Age, years (> 65 vs. ≤ 65)                       | 0.91 (0.58–1.41)    | 0.660             | -                     | -                 |
| Gender (male vs. female)                         | 1.01 (0.67–1.52)    | 0.979             | -                     | -                 |
| ECOG (1 vs. 0)                                   | 1.99 (1.32–3.01)    | <b>0.001</b>      | 2.58 (1.66–4.01)      | <b>&lt; 0.001</b> |
| BMI, kg/m <sup>2</sup>                           | 0.98 (0.92–1.05)    | 0.631             | -                     | -                 |
| Smoking history (yes vs. no)                     | 0.97 (0.64–1.48)    | 0.899             | -                     | -                 |
| Drinking history (yes vs. no)                    | 1.10 (0.69–1.75)    | 0.691             | -                     | -                 |
| Diabetes history (yes vs. no)                    | 1.24 (0.80–1.92)    | 0.343             | -                     | -                 |
| Surgery before chemotherapy (yes vs. no)         | 0.87 (0.44–1.75)    | 0.700             | -                     | -                 |
| Baseline stage (metastatic vs. locally advanced) | 1.74 (1.14–2.67)    | <b>0.001</b>      | 0.84 (0.42–1.69)      | 0.622             |
| Elevated CA19-9 level (yes vs. no)               | 1.31 (0.77–2.25)    | 0.316             | -                     | -                 |
| Liver metastases (yes vs. no)                    | 2.26 (1.49–3.42)    | <b>&lt; 0.001</b> | 3.26 (1.63–6.53)      | <b>&lt; 0.001</b> |
| Multiple metastases (yes vs. no)                 | 1.69 (0.98–2.91)    | <b>0.060</b>      | 1.02 (0.56–1.84)      | 0.951             |
| First-line regimen (GS vs. GnP)                  | 0.55 (0.36–0.85)    | <b>0.006</b>      | 0.60 (0.39–0.93)      | <b>0.024</b>      |

The bold values indicate *P* < 0.1 in the univariable analysis and *P* < 0.05 in the multivariable analysis.

**Table S4** Univariate and multivariate analyses of progression-free survival among the 142 matched patients

| Variables                                        | Univariate analysis |                   | Multivariate analysis |                |
|--------------------------------------------------|---------------------|-------------------|-----------------------|----------------|
|                                                  | HR (95% CI)         | <i>P</i> value    | HR (95% CI)           | <i>P</i> value |
| Age, years (> 65 vs. ≤ 65)                       | 1.11 (0.76–1.63)    | 0.592             | -                     | -              |
| Gender (male vs. female)                         | 0.91 (0.63–1.30)    | 0.593             | -                     | -              |
| ECOG (1 vs. 0)                                   | 1.56 (1.08–2.24)    | <b>0.018</b>      | 1.86 (1.28–2.70)      | <b>0.001</b>   |
| BMI, kg/m <sup>2</sup>                           | 0.98 (0.93–1.04)    | 0.550             | -                     | -              |
| Smoking history (yes vs. no)                     | 0.83 (0.57–1.20)    | 0.314             | -                     | -              |
| Drinking history (yes vs. no)                    | 0.77 (0.50–1.19)    | 0.246             | -                     | -              |
| Diabetes history (yes vs. no)                    | 1.01 (0.68–1.49)    | 0.978             | -                     | -              |
| Surgery before chemotherapy (yes vs. no)         | 1.17 (0.64–2.13)    | 0.615             | -                     | -              |
| Baseline stage (metastatic vs. locally advanced) | 1.92 (1.32–2.81)    | <b>0.001</b>      | 1.43 (0.83–2.46)      | 0.193          |
| Elevated CA19-9 level (yes vs. no)               | 1.47 (0.93–2.33)    | <b>0.098</b>      | 1.68 (1.05–2.70)      | <b>0.031</b>   |
| Liver metastases (yes vs. no)                    | 1.99 (1.37–2.88)    | <b>&lt; 0.001</b> | 1.84 (1.09–3.13)      | <b>0.023</b>   |
| Multiple metastases (yes vs. no)                 | 1.50 (0.92–2.47)    | 0.106             | -                     | -              |
| First-line regimen (GS vs. GnP)                  | 0.55 (0.38–0.80)    | <b>0.002</b>      | 0.51 (0.35–0.75)      | <b>0.001</b>   |

The bold values indicate *P* < 0.1 in the univariable analysis and *P* < 0.05 in the multivariable analysis.

**Table S5** Response to second-line chemotherapy (*n* = 129)

|     | Overall <i>n</i> = 129 | First-line chemotherapy regimen           |                      | <i>P</i> value |
|-----|------------------------|-------------------------------------------|----------------------|----------------|
|     |                        | GS ( <i>n</i> = 42)                       | GnP ( <i>n</i> = 87) |                |
|     |                        | Best response to second-line chemotherapy |                      |                |
| CR  | 0                      | 0                                         | 0                    |                |
| PR  | 6 (4.7%)               | 1 (2.4%)                                  | 5 (5.7%)             |                |
| SD  | 48 (37.2%)             | 16 (38.1%)                                | 32 (36.8%)           |                |
| PD  | 75 (58.1%)             | 25 (59.5%)                                | 50 (57.5%)           |                |
| ORR | 6 (4.7%)               | 1 (2.4%)                                  | 5 (5.7%)             | 0.686          |
| DCR | 54 (41.9%)             | 17 (40.5%)                                | 37 (42.5%)           | 0.975          |

CR, complete response; DCR, disease control rate; ORR, objective response rate; PD, progressive disease; PR, partial response; SD, stable disease.
